# Supplementary material
Source: Springer Nature journal article supplement (https://www.springermedizin.de/resource/supplementary/12985_2007_331_MOESM3_ESM.pdf/9607538)

## A. Ab titers in serum

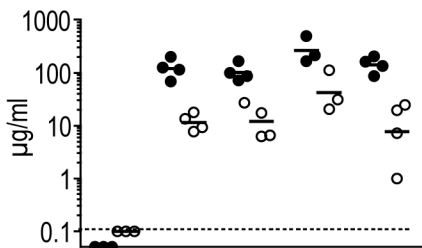

## B. Nose

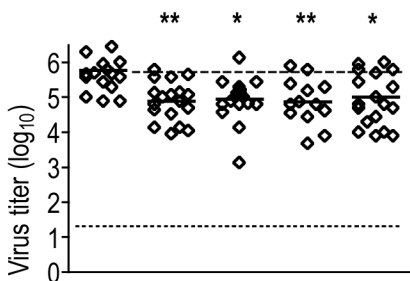

## C. Trachea

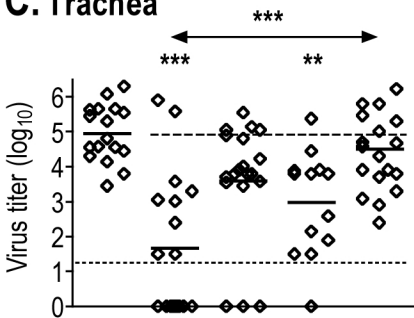

## D. Lung

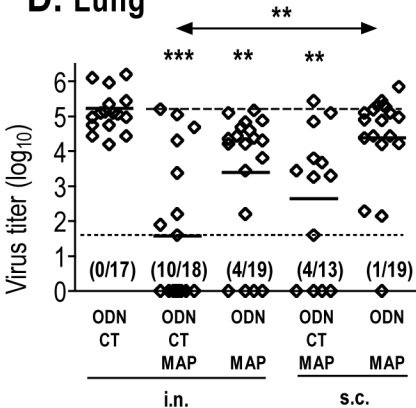

Supplement: MOESM3 [file 9607538]
